# Supplementary material for: Biochemical Profile and In Vitro Therapeutic Properties of Two Euhalophytes, Halocnemum strobilaceum Pall. and Suaeda fruticosa (L.) Forske., Grown in the Sabkha Ecosystem in the Algerian Sahara
Source: MDPI journal article supplement (doi:10.3390/molecules28083580), 2023-04-19
Supplement: s1 [file s1]

Article

# Biochemical Profile and *In Vitro* Therapeutic Properties of Two Euphalophytes, *Halocnemum strobilaceum* Pall. And *Suaeda fruticosa* (L.) Forske., Grown in the Sabkha Ecosystem in the Algerian Sahara

Noura Gheraissa<sup>1,2</sup>, Ahmed Elkhaila Chems<sup>1,3</sup>, Nezar Cherrada<sup>1,2</sup>, Ebru Erol<sup>4</sup>, Eman Ramadan Elsharkawy<sup>5</sup>, Djilani Ghemam Amara<sup>3,6</sup>, Soumeia Zeghoud<sup>7</sup> Abdelkrim Rebiai<sup>7,\*</sup>, Mohammed Messaoudi<sup>7,8</sup>, Barbara Sawicka<sup>9</sup>, Maria Atanassova<sup>9</sup> and Maged S. Abdel-Kader<sup>11,12\*</sup>

1. Laboratory of Biodiversity and Application of Biotechnology in Agriculture, El Oued University, El Oued 39000, Algeria
  2. Department of Cellular and Molecular Biology, Faculty of Natural Science and Life, El Oued University, El Oued 39000, Algeria
  3. Department of Biology, Faculty of Natural Science and Life, El Oued University, El Oued 39000, Algeria
  4. Department of Analytical Chemistry, Faculty of Pharmacy, Bezmialem Vakif University, İstanbul 34093, Türkiye;
  5. Department of Chemistry, Faculty of Science, Northern Border University, Arar 73213, Saudi Arabia
  6. Chemistry Department, Faculty of Exact Sciences, University of El Oued, El Oued 39000, Algeria
  7. Laboratory of Biology, Environment and Health, El Oued University, El Oued 39000, Algeria
  8. Nuclear Research Centre of Birine, Ain Oussera, Djelfa 17200, Algeria
  9. Department of Plant Production Technology and Commodities Science, University of Life Science in Lublin, Akademicka 15 Str., 20-950 Lublin, Poland;
  10. Nutritional Scientific Consulting, Chemical Engineering, University of Chemical Technology and Metallurgy, 1734 Sofia, Bulgaria
  11. Department of Pharmacognosy, College of Pharmacy, Prince Sattam Bin Abdulaziz University, Al-Kharj 11942, Saudi Arabia
  12. Department of Pharmacognosy, Faculty of Pharmacy, Alexandria University, Alexandria 21215, Egypt
- \* Correspondence: rebiai-abdelkrim@univ-eloued.dz (A.R.); mpharm101@hotmail.com (M.S.A.-K.)

**Table S1.** Determination of phenolic compounds of some plants of the *Chenopodiaceae* family using HPLC analysis

| Plant species           | Phenolic compounds      | Amount (µg/100 mg ED) | Reference |
|-------------------------|-------------------------|-----------------------|-----------|
| <i>Suaeda fruticosa</i> | Gallic acid             | 0.449±0.02            | [12]      |
|                         | Catechin                | 166.7±8               |           |
|                         | Chlorogenic acid        | 126.8±9               |           |
|                         | Caffeic acid            | 383±1                 |           |
|                         | Quercetin               | 0.247±1               |           |
|                         | Kaempferol              | 176±1                 |           |
|                         | Chlorogenic acid        | 288                   | [34]      |
|                         | Caffeic acid            | 47                    |           |
|                         | <i>p</i> -Coumaric acid | 133                   |           |
|                         | Gallic acid             | 51                    |           |
|                         | Rutin                   | 32                    |           |
|                         | Vanillin                | 17                    |           |
|                         | Vanillic acid           | 288                   |           |

|                                |                         |          |      |
|--------------------------------|-------------------------|----------|------|
| <i>Beta vulgaris L. (root)</i> | Gallic acid             | 11.01    | [35] |
|                                | Catechol                | 7.38     |      |
|                                | <i>p</i> -Coumaric acid | 0.74     |      |
|                                | Ferulic acid            | 0.68     |      |
|                                | <i>o</i> -Coumaric acid | 1.31     |      |
|                                | Cinnamic acid           | 0.60     |      |
|                                | Myricetin               | 19.25    |      |
|                                | Neringenin              | 19.92    |      |
|                                | Kaempferol              | 3.02     |      |
|                                | Apigenin                | 2.65     |      |
| <i>Beta vulgaris L. (root)</i> | Coumarin acid           | 325.0395 | [36] |
|                                | Resorcinol              | 0.0562   |      |
|                                | Quercetin               | 136.0987 |      |
|                                | Kaempferol              | 43.2809  |      |
|                                | Naphthaline             | 0.1974   |      |

## References

12. Qasim, M., et al., *Antioxidant properties, phenolic composition, bioactive compounds and nutritive value of medicinal halophytes commonly used as herbal teas*. South African Journal of Botany, 2017. **110**: p. 240-250.
34. Gheraissa, N., et al., *Phenolic compound profile, and evaluation of biological properties of Bassia muricata (L.) Asch. aerial part*. International Journal of Secondary Metabolite, 2022. **Vol. 9, No. 3**: p. 335-347.
35. El-Beltagi, H., et al., *Evaluation of some chemical constituents, antioxidant, antibacterial and anticancer activities of beta Vulgaris L. Root*. Fresenius Environmental Bulletin, 2018. **27**: p. 6369-6378.
36. Shalaby, H. and A. Hassenin, *Effects of Fortification Stirred Yoghurt with Red Beet Powder (RBP) on Hypercholesterolemia Rats*. European Journal of Agriculture and Food Sciences, 2020. **2**.
